# Supplementary material for: Constructing a VS4–V2CTx heterojunction interface to realize an ultra-long lifetime and high rate capability in sodium-ion batteries
Source: Royal Society of Chemistry journal article supplement (doi:10.1039/d3qi00712j), 2023-01-01
Supplement: d3qi00712j1.pdf [file d3qi00712j1.pdf]

## **Constructing VS<sub>4</sub>-V<sub>2</sub>CT<sub>x</sub> heterojunction interface to realize ultra-long lifetime and high rate capability in sodium-ion batteries**

Lin Chen<sup>1</sup>, Mingshan Wang<sup>1,2\*</sup>, Enzhi Li<sup>1</sup>, Xi Hu, Siming Huang<sup>1</sup>, Zhenliang Yang<sup>3</sup>,  
Dan Zhou<sup>4</sup>, Haijiao Xie<sup>5</sup>, Junchen Chen<sup>1,2</sup>, Zhiyuan Ma<sup>1,2</sup>, Bingshu Guo<sup>1,2</sup>, Bo Yu<sup>1,2</sup>,  
Xing Li<sup>1,2\*</sup>

<sup>1</sup>School of New Energy and Materials, Southwest Petroleum University, Chengdu,  
Sichuan 610500, P.R. China

<sup>2</sup>Energy Storage Research Institute, Southwest Petroleum University, Chengdu,  
Sichuan 610500, P.R. China

<sup>3</sup>Institute of Materials, China Academy of Engineering Physics, Mianyang, Sichuan  
621908, P.R. China

<sup>4</sup>Beijing Advanced Innovation Center for Materials Genome Engineering, University  
of Science and Technology Beijing, Beijing 100083, P.R. China

<sup>5</sup>Hangzhou Yanqu Information Technology Co., Ltd., Hangzhou, Zhejiang, 310003,  
P.R. China

---

<sup>1</sup> Corresponding author: E-mail: [ustbwangmingshan@163.com](mailto:ustbwangmingshan@163.com) (Mingshan Wang),  
[lixing198141@yahoo.com](mailto:lixing198141@yahoo.com) (Xing Li).

TGA analysis to calculate  $V_2CT_x$  content in  $VS_4-V_2CT_x$

Assume that the amount lost during thermal decomposition of each component in the  $VS_4-V_2CT_x$  composite sample, and the amount decomposed when the components are pure substances remain constant. At this point we assume that the content of  $V_2CT_x$  and  $VS_4$  in the composite sample is X and Y respectively, thereby setting out the following system of equations:

$$X + Y = 100\%$$

$$X*25.61\% + Y*40.88\% = 37.54\%$$

Therefore, X=21.87% Y=78.13%

The  $Na^+$  ion diffusion ( $D_{Na^+}$ ) for  $VS_4-V_2CT_x$  and  $VS_4$  electrodes is calculated according to the following equation:

$$D_{Na^+} = 0.5(RT/AF^2C\sigma)^2$$

where  $R = 8.314 \text{ J mol}^{-1} \text{ K}^{-1}$ ,  $T = 303.15 \text{ K}$ ,  $A = 1.54 \text{ cm}^2$ ,  $F = 9.6486 \times 10^4 \text{ C mol}^{-1}$ ,  $C \approx 2 \times 10^{-2} \text{ mol cm}^{-3}$ ,  $\sigma$  represents the Warburg impedance coefficient can be obtained from the following equation:

$$Z_{re} = R_e + R_{ct} + \sigma\omega^{-1/2}$$

The  $\sigma_w$  of the two electrodes are obtained by fitting in Figure S6 (b).

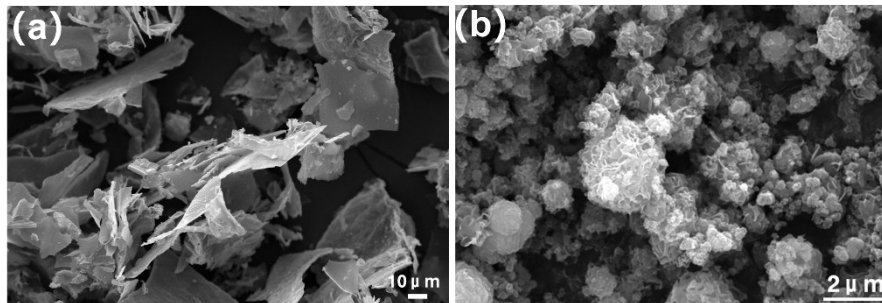

**Figure S1.** (a) SEM image of  $V_2CT_x$ , and (b) SEM image of  $VS_4$ ;

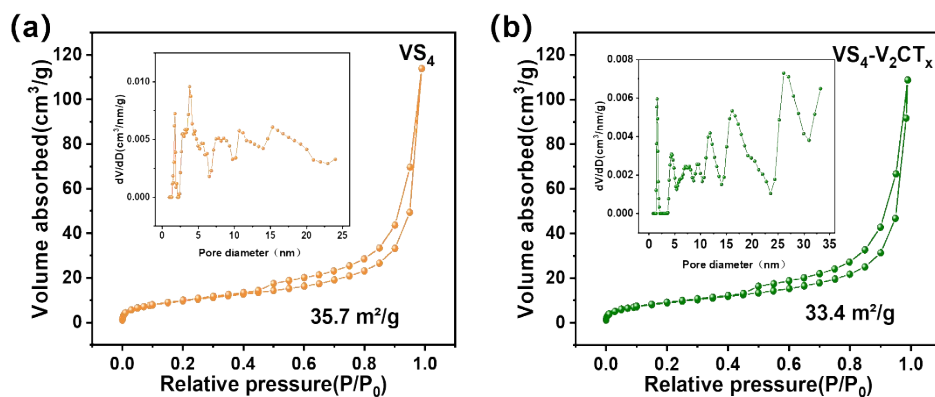

**Figure S2** (a) Nitrogen adsorption–desorption isotherm of the VS<sub>4</sub> and (b) VS<sub>4</sub>-V<sub>2</sub>CT<sub>x</sub> composites, the inset in (a) (b) shows the corresponding pore size distribution plot.

**Table S1** BET data and pores data for VS<sub>4</sub> and VS<sub>4</sub>-V<sub>2</sub>CT<sub>x</sub>

| Material                                        | BET surface<br>(m <sup>2</sup> g <sup>-1</sup> ) | DFT                                               |                                                   |                    |
|-------------------------------------------------|--------------------------------------------------|---------------------------------------------------|---------------------------------------------------|--------------------|
|                                                 |                                                  | Pore Volume<br>(cm <sup>3</sup> g <sup>-1</sup> ) | Surface area<br>(m <sup>2</sup> g <sup>-1</sup> ) | Pore width<br>(nm) |
| VS <sub>4</sub>                                 | 35.7                                             | 0.10                                              | 24.0                                              | 3.8                |
| VS <sub>4</sub> -V <sub>2</sub> CT <sub>x</sub> | 33.4                                             | 0.11                                              | 27.8                                              | 26.1               |

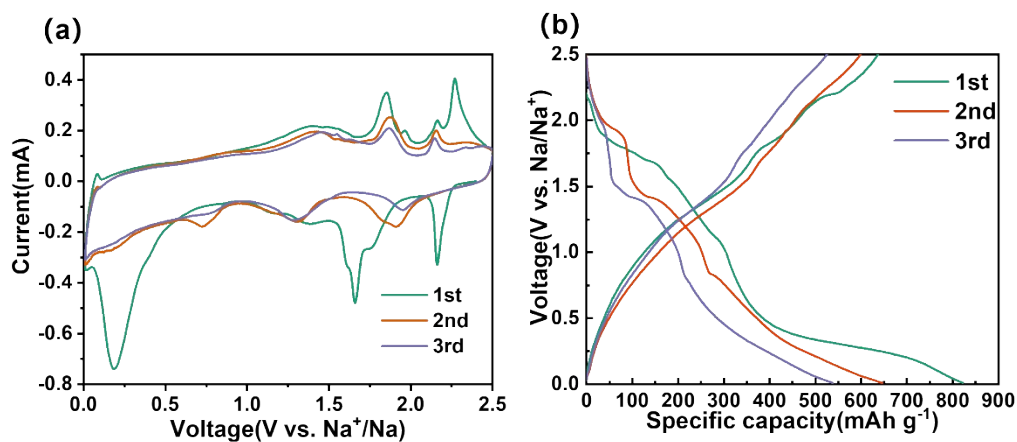

**Figure S3.** (a) CV curves of the VS<sub>4</sub> electrode and (b) Galvanostatic charge/discharge curves of VS<sub>4</sub>

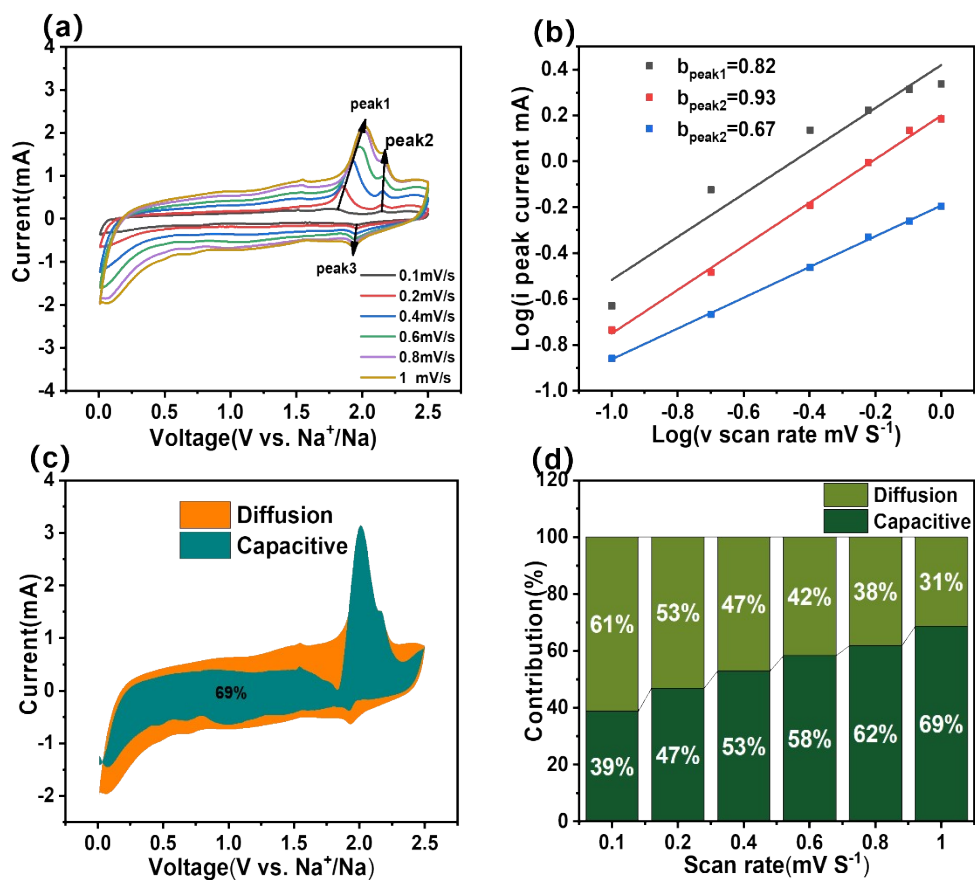

**Figure S4.** (a) CV curves of the VS<sub>4</sub> electrode tested at different scan rates; (b) relationship between  $\log i$  and  $\log v$  plots of the VS<sub>4</sub> electrode; (c) capacitance contribution at 1.0 mV s<sup>-1</sup> for the VS<sub>4</sub> electrode; (d) capacitance contribution of the VS<sub>4</sub> electrode at different scan rates

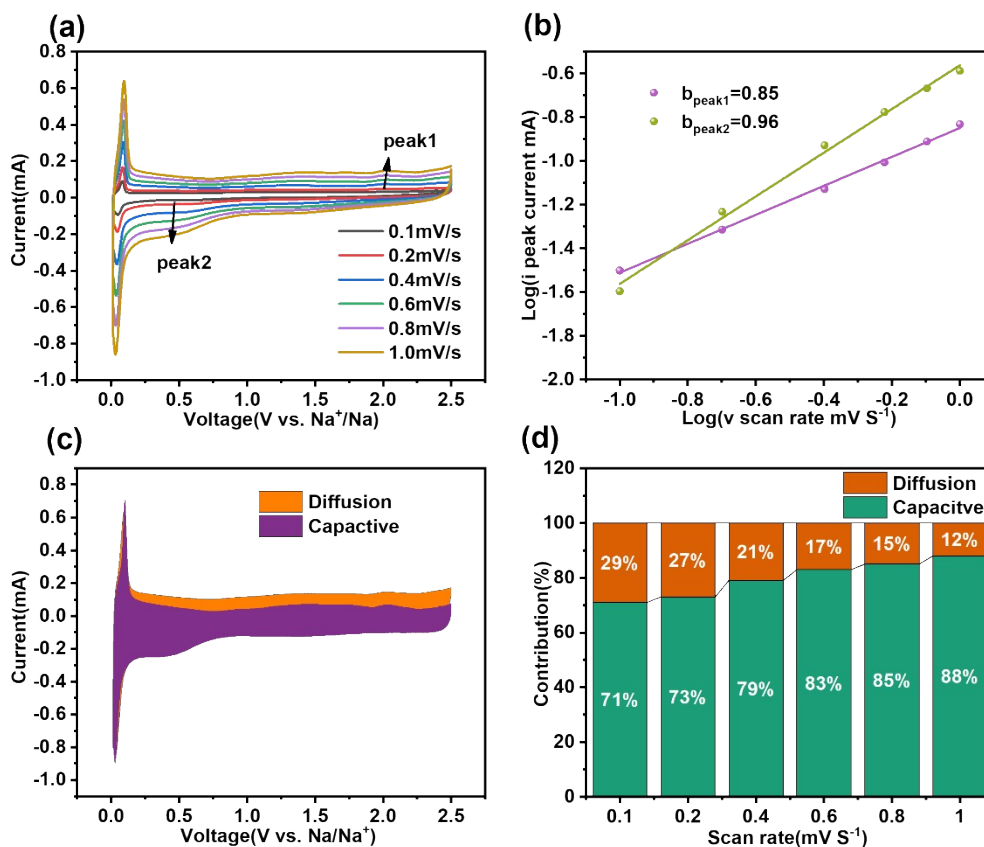

**Figure S5.** (a) CV curves of the  $V_2CT_x$  electrode tested at different scan rates; (b) relationship between  $\log i$  and  $\log v$  plots of the  $V_2CT_x$  electrode; (c) capacitance contribution at  $1.0 \text{ mV s}^{-1}$  for the  $V_2CT_x$  electrode; (h) capacitance contribution of the  $V_2CT_x$  electrode at different scan rates

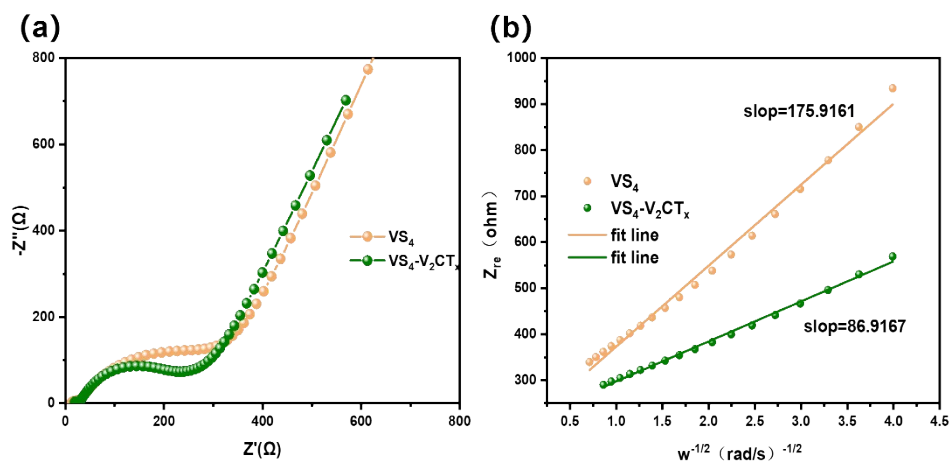

**Figure S6.** (a) The Nyquist plots and (b) linear fits in low-frequency regions of the  $VS_4-V_2CT_x$  and  $VS_4$  electrodes after 100 cycles at discharge state.

**Table S2** Electrochemical impedance parameters of the VS<sub>4</sub> and VS<sub>4</sub>-V<sub>2</sub>CT<sub>x</sub> electrodes

| Samples                                         | $R_e$ | $R_f$ | $R_{ct}$ | $\sigma$ ( $\Omega \text{ cm}^2 \text{ s}^{-1/2}$ ) | $D_{\text{Na}^+}$ ( $\text{cm}^2 \text{ s}^{-1}$ ) |
|-------------------------------------------------|-------|-------|----------|-----------------------------------------------------|----------------------------------------------------|
| VS <sub>4</sub>                                 | 11.01 | 18.25 | 295.4    | 175.9161                                            | $5.22 \times 10^{-6}$                              |
| VS <sub>4</sub> -V <sub>2</sub> CT <sub>x</sub> | 16.66 | 6.51  | 140.1    | 86.9167                                             | $2.14 \times 10^{-5}$                              |

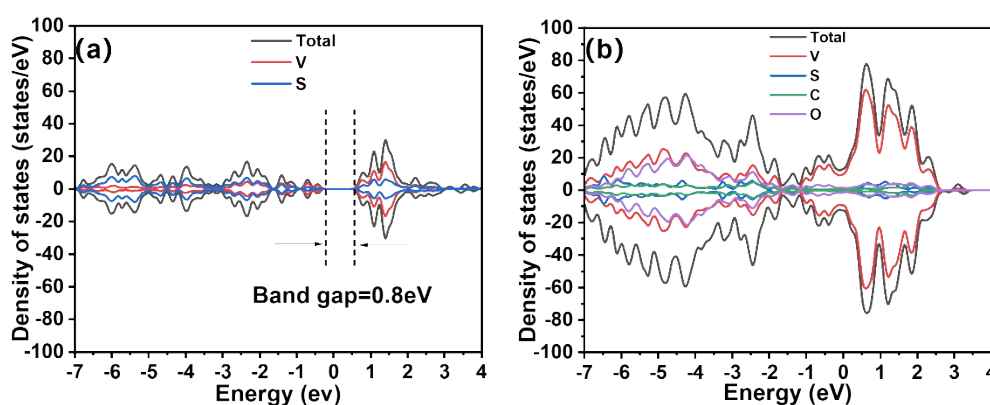

**Figure S7.** Total density of states of (a) VS<sub>4</sub> and (b) VS<sub>4</sub>-V<sub>2</sub>CT<sub>x</sub> heterojunction.

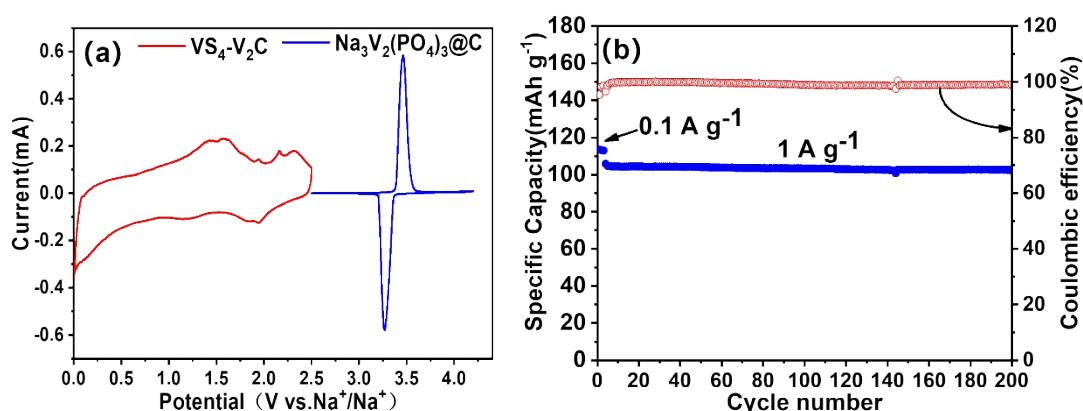

**Figure S8.** (a) CV curves of the VS<sub>4</sub>-V<sub>2</sub>C and Na<sub>3</sub>V<sub>2</sub>(PO<sub>4</sub>)<sub>3</sub>@C electrode at 0.1 mV s<sup>-1</sup>; (b) Long cycling performance of Na<sub>3</sub>V<sub>2</sub>(PO<sub>4</sub>)<sub>3</sub>@C electrode at a current density of 1 A g<sup>-1</sup> (0.1 A g<sup>-1</sup> for the first three cycles);
